# Supplementary material for: Lamprey immune protein triggers the ferroptosis pathway during zebrafish embryonic development
Source: Research Square preprint supplement (doi:10.21203/rs.3.rs-1309258/v1), 2022-02-04
Supplement: Supplementary file 2 [file 7d81f298eeb2e6ba39fe452d.pdf]

Table S3 Summary of sequence data generated for zebrafsh transcriptome and quality filtering.

| Sample   | Clean reads | Total mapped reads | Uniquely mapped rate (%) | Q30 percentage (%) | GC percentage (%) |
|----------|-------------|--------------------|--------------------------|--------------------|-------------------|
| WT_19hpf | 54.94M      | 50.68M             | 89.05%                   | 92.20%             | 46.58%            |
| WT_36hpf | 51.18M      | 47.31M             | 87.54%                   | 92.50%             | 46.61%            |
| WT_60hpf | 56.27M      | 51.93M             | 87.39%                   | 92.24%             | 46.35%            |
| WT_96hpf | 49.34M      | 45.31M             | 87.61%                   | 92.27%             | 46.32%            |
| Tg_19hpf | 50.99M      | 47.34M             | 89.42%                   | 92.32%             | 46.67%            |
| Tg_36hpf | 50.32M      | 46.69M             | 87.62%                   | 92.04%             | 46.45%            |
| Tg_60hpf | 53.59M      | 49.65M             | 87.56%                   | 92.26%             | 46.17%            |
| Tg_96hpf | 51.32M      | 47.38M             | 88.35%                   | 92.20%             | 46.29%            |
