# Supplementary figures and images for: Lamprey immune protein triggers the ferroptosis pathway during zebrafish embryonic development
Source: Research Square preprint supplement (doi:10.21203/rs.3.rs-1309258/v1), 2022-02-04

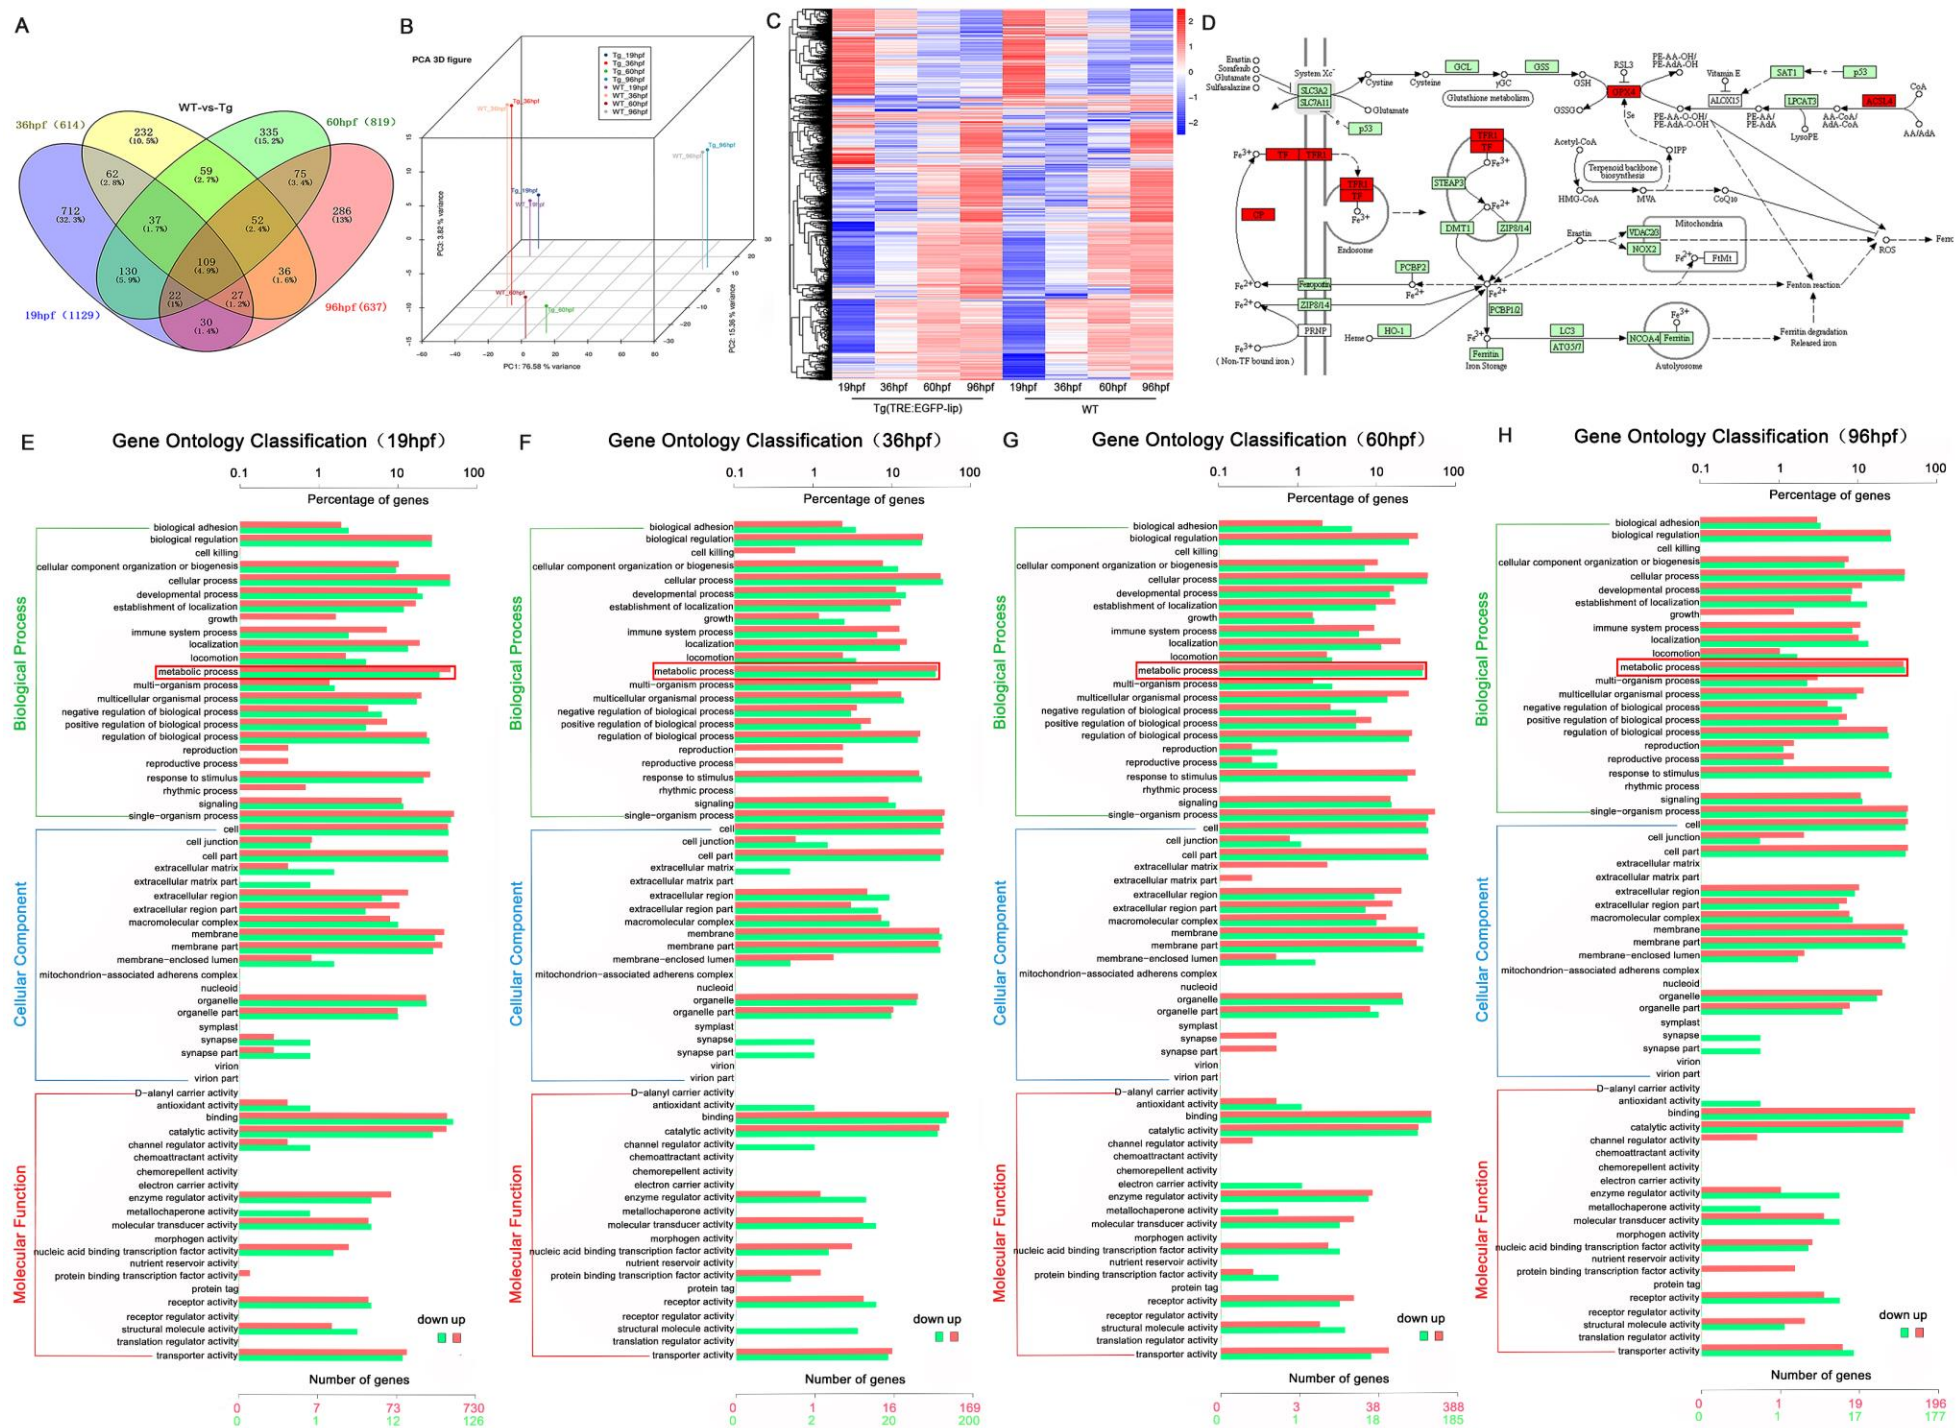

Supplement: Supplementary file 1 [file 2a568cfcb91030b60f11e53f.pdf]
